# Supplementary material for: Accounting for body mass effects in the estimation of field metabolic rates from body acceleration
Source: Oxford University Press journal article supplement (doi:10.1242/jeb.233544), 2021-02-03
Supplement: jeb233544supp.pdf [file jeb233544supp.pdf]

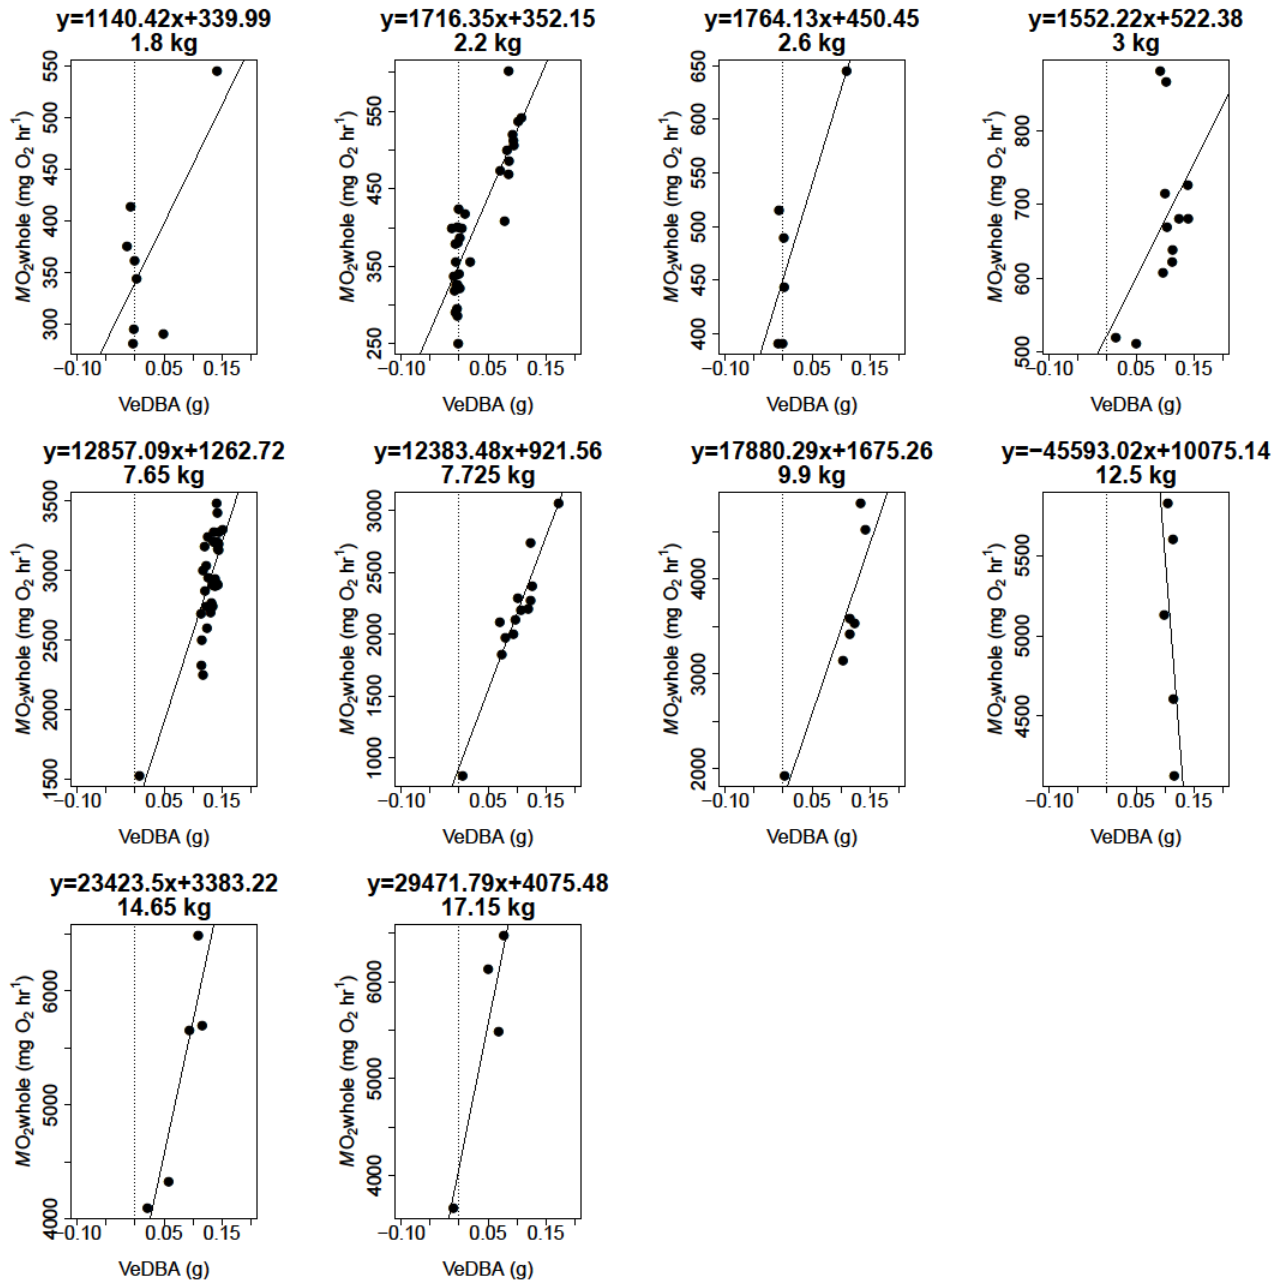

**Fig. S1. Linear fits of the  $\dot{M}O_{2\text{whole}}$ -VeDBA relationship for each mass class, predicted by the best-fit linear effects model.** The mass and equation for each mass class are shown above the respective plot. Horizontal dotted lines represent the point of zero activity (y-axis).

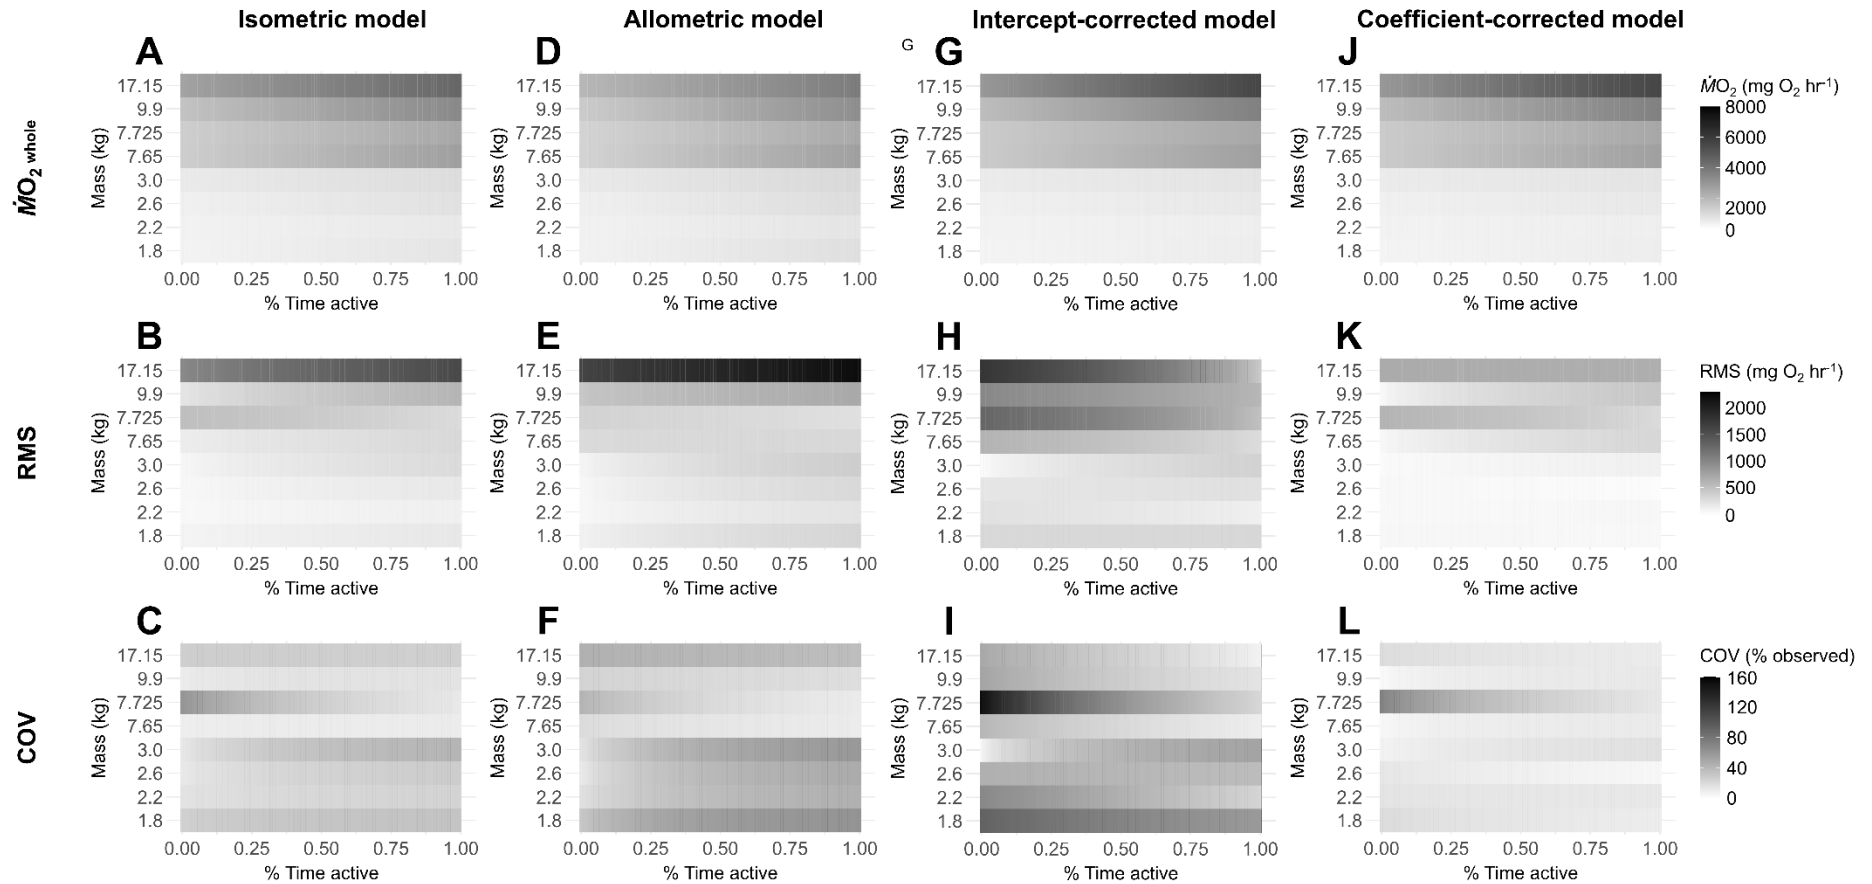

**Fig. S2. Results of a simulation conducted to show how estimation error of different whole animal respiration rate ( $\dot{M}O_{2\text{whole}}$ ) modelling techniques changes across a range of activity levels and all available mass classes. A day in the life of 100 sharks for all available mass classes (1.8 – 17.15 kg) was repeatedly simulated, where the proportion of time spent active was varied.  $\dot{M}O_{2\text{whole}}$ , root-mean squared error (RMS),**

and coefficient of variation (COV) were calculated over the full range of activity for each body mass using the *isometric response-corrected* (A-C), *allometric response-corrected* (D-F), *intercept-corrected* (G-I), and *coefficient-corrected* (J-K) modelling approaches. Resultant values  $\dot{M}O_{2\text{whole}}$ , RMS, COV are colour-coded with low to high values represented by a light to dark gradient, respectively.
